# Supplementary material for: A Machine Learning-Based Identification of Genes Affecting the Pharmacokinetics of Tacrolimus Using the DMETTM Plus Platform
Source: MDPI journal article supplement (doi:10.3390/ijms21072517), 2020-04-04
Supplement: s1 [file s1]

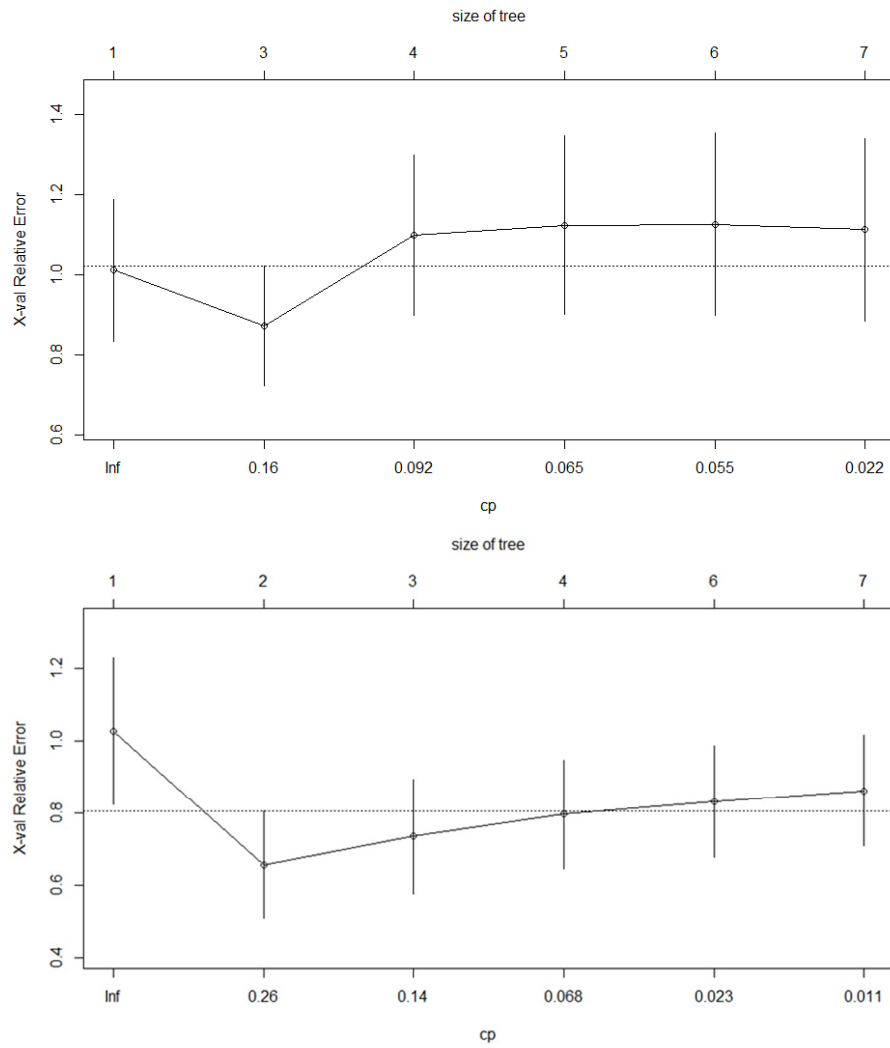

**Supplemental Figure S1.** Number of splits in the pruned decision trees with different complexity parameters (CPs) and the corresponding cross validated (X-val) relative errors. The horizontal axis is not in scale. The dashed line indicates the minimum relative error.

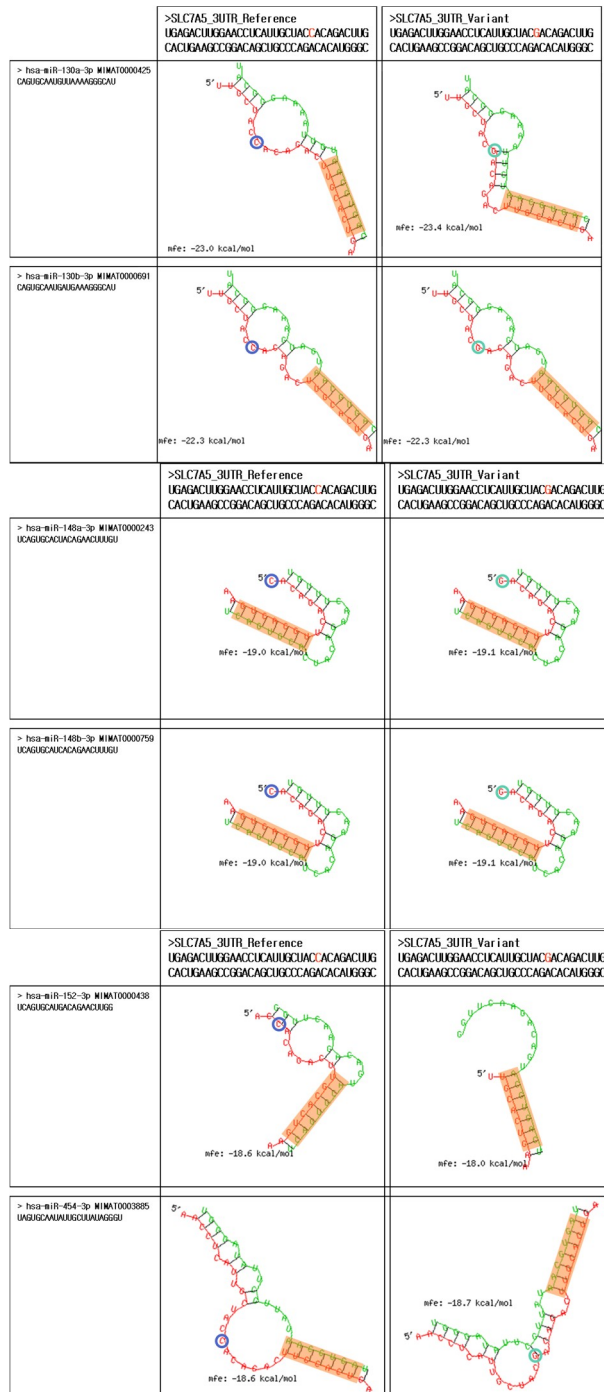

**Supplemental Figure S2.** Duplexes identified by in silico analysis between microRNAs (miRs) and *rs1060253* of the *SLC7A5* (left: reference allele; right: variant allele) for six miRs (top: hsa-miR-130a-3p, -148a-3p, and -152-3p from left to right; bottom: -130b-3p, 148b-3p, and -454-3p from left to right). The shades denote the seed region of six miRNAs (miR-130a-3p, -130b-3p, -148a-3p, 148b-3p -152-3p, and -454-3p). The circles represent the reference and variant nucleotides of *rs1060253*.

**Supplemental Table S1.** Tacrolimus C<sub>max</sub> and AUC<sub>last</sub> by *rs776746* (CYP3A5) and *rs1137115* (CYP2A6).

|                 |          | <i>rs1137115</i>     |                                         |                                              |                      |                                         |                                              |
|-----------------|----------|----------------------|-----------------------------------------|----------------------------------------------|----------------------|-----------------------------------------|----------------------------------------------|
|                 |          | C/C                  |                                         |                                              | T/T, C/T             |                                         |                                              |
|                 |          | Total subject number | C <sub>max</sub> (µg ml <sup>-1</sup> ) | AUC <sub>last</sub> (h µg ml <sup>-1</sup> ) | Total subject number | C <sub>max</sub> (µg ml <sup>-1</sup> ) | AUC <sub>last</sub> (h µg ml <sup>-1</sup> ) |
| <i>rs776746</i> | C/C      | 39                   | 6.03±2.27                               | 54.34±21.44                                  | 7                    | 9.78±1.92                               | 92.53±20.46                                  |
|                 | T/T, C/T | 24                   | 4.94±1.41                               | 31.52±8.23                                   | 11                   | 3.75±1.06                               | 25.44±7.72                                   |

Abbreviations: C<sub>max</sub>, maximum plasma concentration; AUC<sub>last</sub>, area under the concentration curve from time zero to the last quantifiable time point.

Data are shown as mean ± standard deviation.
